# Supplementary material for: The Novel Serine/Threonine Protein Kinase LmjF.22.0810 from Leishmania major May Be Involved in the Resistance to Drugs such as Paromomycin
Source: Biomolecules. 2019 Nov 11;9(11):723. doi: 10.3390/biom9110723 (PMC6920834; doi:10.3390/biom9110723)

## Supplemental Material

**Supplemental Table S1.** H-bonds found in LmJean3 kinase domain at least in 30% of the trajectory.

| Donor       | Acceptor    | Occupancy (>30%) |
|-------------|-------------|------------------|
| HIS121-Side | ASP192-Side | 84.22%           |
| HIS127-Main | ASP192-Side | 78.02%           |
| LEU82-Main  | VAL35-Main  | 70.98%           |
| GLU9-Main   | ARG26-Main  | 67.28%           |
| ARG254-Side | SER248-Main | 65.68%           |
| SER236-Side | GLU103-Side | 63.84%           |
| ILE10-Main  | ARG3-Main   | 63.49%           |
| THR205-Side | TYR201-Main | 62.99%           |
| SER236-Main | GLU103-Side | 62.69%           |
| ARG51-Side  | GLU47-Side  | 62.64%           |
| ALA36-Main  | LYS23-Main  | 62.24%           |
| ARG24-Main  | ASP12-Main  | 62.14%           |
| TYR78-Main  | VAL39-Main  | 61.94%           |
| ARG128-Main | ASP192-Side | 60.49%           |
| HIS27-Main  | CYS32-Main  | 59.69%           |
| VAL114-Main | LEU110-Main | 58.09%           |
| ARG268-Side | GLU238-Side | 56.44%           |
| ARG58-Side  | GLU70-Side  | 56.09%           |
| PHE34-Main  | VAL25-Main  | 55.29%           |
| VAL25-Main  | PHE34-Main  | 55.09%           |
| SER195-Side | TYR176-Main | 55.04%           |
| VAL5-Main   | TYR8-Main   | 54.40%           |
| LYS37-Main  | ILE80-Main  | 53.90%           |
| ILE80-Main  | LYS37-Main  | 53.70%           |
| SER229-Main | PRO209-Main | 52.70%           |
| LEU72-Main  | TYR79-Main  | 52.25%           |
| TYR79-Main  | LEU72-Main  | 52.15%           |
| ILE38-Main  | LYS21-Main  | 52.05%           |
| HIS121-Main | VAL117-Main | 51.40%           |
| ARG118-Side | ASP258-Side | 51.25%           |
| ARG152-Side | ASP49-Side  | 51.05%           |
| ASN64-Side  | LEU143-Main | 50.10%           |

**Supplemental Table S1.** H-bonds found in LmJean3 kinase domain at least in 30% of the trajectory.

| Donor       | Acceptor    | Occupancy (>30%) |
|-------------|-------------|------------------|
| ARG26-Main  | GLU9-Main   | 49.85%           |
| LYS23-Main  | ALA36-Main  | 49.75%           |
| LEU137-Main | GLY88-Main  | 48.95%           |
| ARG254-Side | ARG190-Main | 47.45%           |
| LYS41-Main  | ASN76-Main  | 46.30%           |
| ILE81-Main  | GLU70-Main  | 45.75%           |
| ARG268-Side | ASP264-Side | 45.50%           |
| HIS127-Side | SER146-Main | 45.30%           |
| VAL39-Main  | TYR78-Main  | 44.41%           |
| HIS27-Side  | THR30-Side  | 42.81%           |
| VAL22-Main  | GLY15-Main  | 41.16%           |
| ASN134-Side | ASP129-Main | 40.61%           |
| ARG190-Side | GLU252-Side | 39.96%           |
| LEU143-Main | GLN112-Side | 38.76%           |
| ILE199-Main | SER195-Main | 37.91%           |
| ILE69-Main  | ILE81-Main  | 37.91%           |
| VAL35-Main  | LEU82-Main  | 37.36%           |
| LEU110-Main | VAL106-Main | 37.26%           |
| ALA107-Main | GLU103-Main | 36.76%           |
| LYS41-Side  | GLU47-Side  | 36.76%           |
| VAL66-Main  | ILE145-Main | 36.51%           |
| GLU103-Main | GLU103-Side | 35.26%           |
| GLN112-Side | ALA108-Main | 35.01%           |
| LYS21-Side  | GLY17-Main  | 34.52%           |
| ILE145-Main | ASN64-Main  | 33.37%           |
| GLN67-Main  | GLU83-Side  | 33.07%           |
| SER146-Side | ASP147-Side | 33.07%           |
| LEU247-Main | CYS243-Main | 32.72%           |
| ILE111-Main | ALA107-Main | 31.82%           |
| LEU11-Main  | ARG24-Main  | 31.82%           |
| ILE28-Main  | ASP7-Main   | 31.72%           |
| VAL14-Main  | VAL22-Main  | 30.22%           |

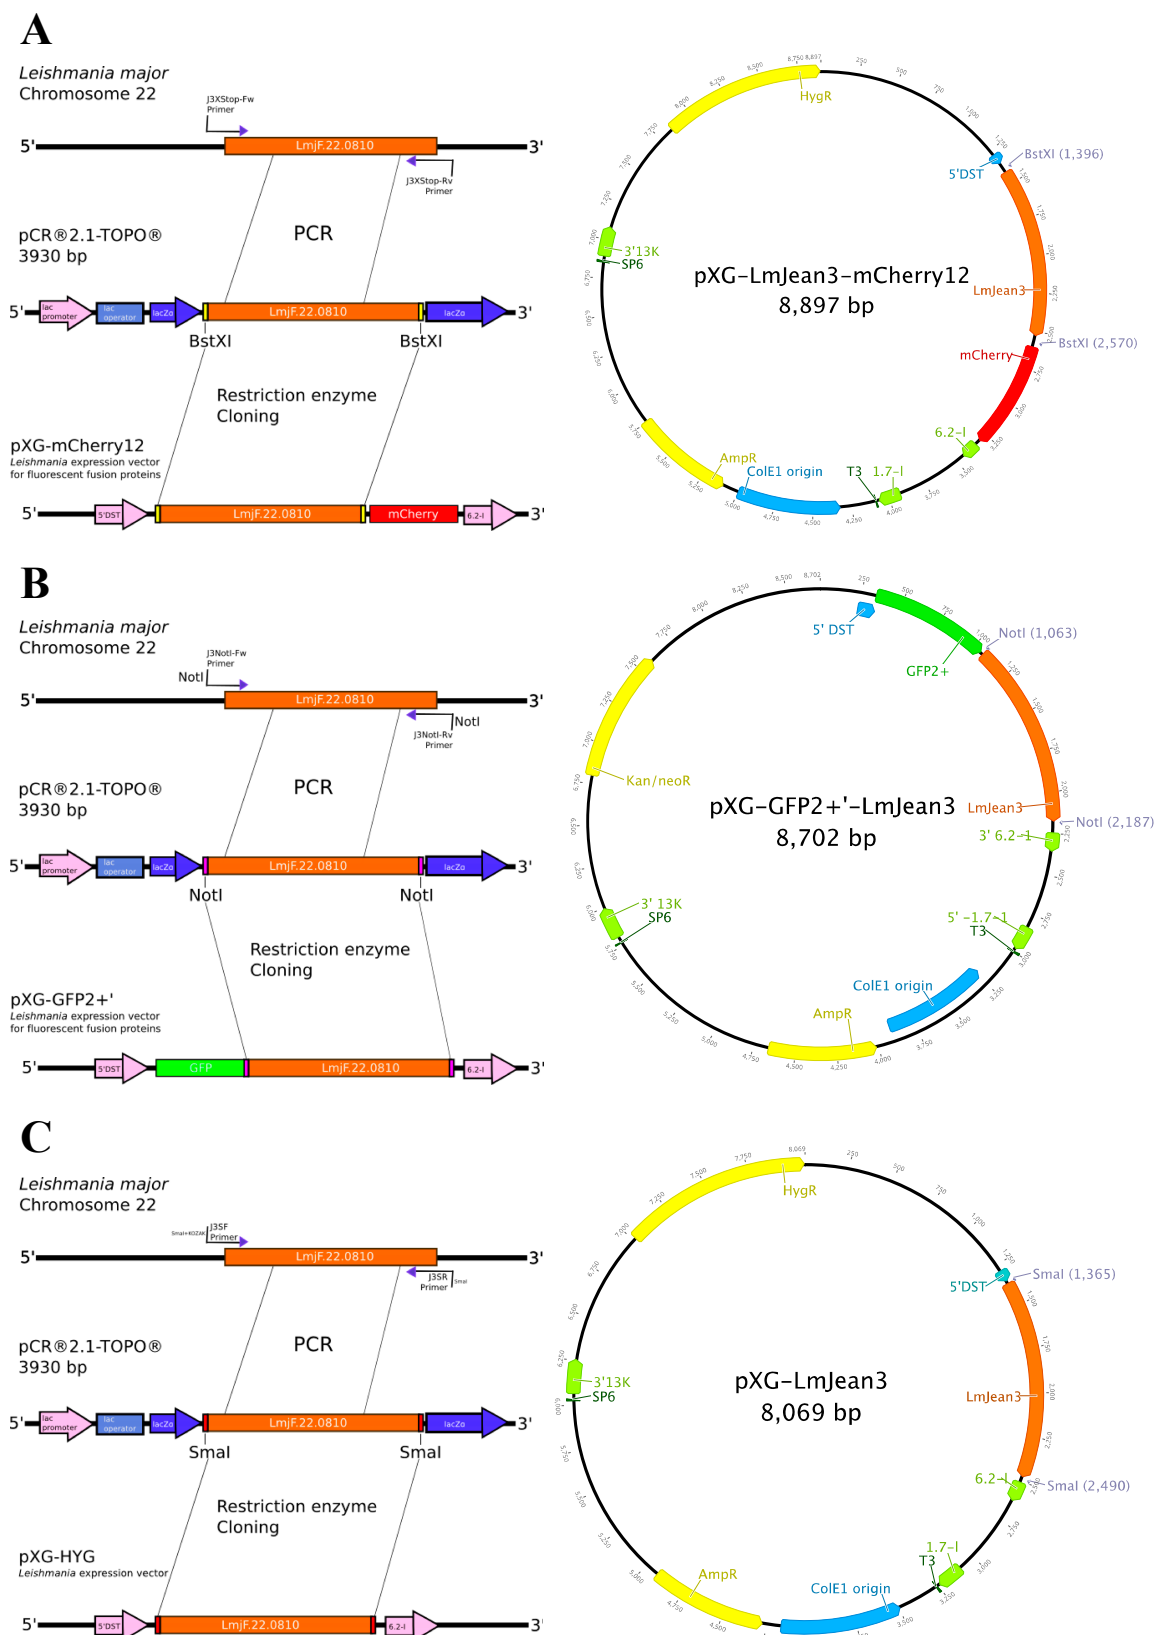

**Supplemental Figure S1.** Schematic representation of the cloning approach to generate the expression vectors: A) pXG-LmJean3-mCherry12, B) pXG-GFP2<sup>+</sup>-LmJean3, and C) pXG-Hyg-LmJean3.

**Supplemental Table S2.** Primer sequences used for the construction of expression plasmids.

| Primer     | Sequence (5'→ 3')                |
|------------|----------------------------------|
| J3NotI-Fw  | attgcgccgcATGCGGCGAGTCGGCGACTAC  |
| J3NotI-Rv  | ttgcgccgcCTAAACGTCTCCGCAGTATCC   |
| J3XStop-Fw | acggtacaagtATGgGGCGAGTCGGCGACTAC |
| J3XStop-Rv | gaactagtAACGTCTCCGCAGTATCCACC    |
| J3SF       | aaccgggagtATGGGGCGAGTCGGCGACTAC  |
| J3SR       | taccgggCTAAACGTCTCCGCAGTATCC     |

\* Lower-case letters indicate added restriction enzyme sites.

**Supplemental Table S3.** Primer sequences used for qPCR analyses

| <b>Gene</b>          | <b>Forward sequence (5'→ 3')</b> | <b>Reverse sequence (5'→ 3')</b> |
|----------------------|----------------------------------|----------------------------------|
| <i>Jean3</i>         | AGCCGCCTCCACAGGGAAAG             | GACGTACGCAATGCACCCCA             |
| <i>α-tubulin</i>     | ATGCGTGAGGCTATCTGCATCCACAT       | TAGTGGCCACGAGCGTAGTTGTTTCG       |
| <i>ABCH1</i>         | CGGGTTTGTCTTTCAGTCGT             | CACCAGAGAGCATTGATGGA             |
| <i>ABCA3</i>         | ACGGGAACGGTAACATTGCT             | GGCACAGCATCGAAATCGTC             |
| <i>ATPase 1-like</i> | CTGTGCAACACAGTTCAGCC             | TTGATGAGGCGATAGCCGAC             |
| <i>ABCC2</i>         | GCAGCCCCATGATGTTTATT             | TCCGTTGCCTTCACTAGCTT             |
| <i>MRPA</i>          | CGCTTATCACCGACTGACGA             | CCACCGCCTCCAAATCAGTA             |
| <i>GAPDH</i>         | ACCACCATCCACTCCTACA              | CGTGCTCGGGATGATGTTTA             |

Genomic tracks showing the LmjF22.0810 gene structure and its orthologs in other Leishmania species. The top track shows the LmjF22.0810 gene structure with exons and introns. Below are tracks for LmjF22.0810, LmxM22.0810, LbrM22.0750, LinJ22.0630, TcCLB510525.10, and Tb927.2.7250. Each track shows the gene structure with exons and introns, and the corresponding protein sequence. The protein sequence is shown in a color-coded format where different colors represent different amino acid types. The tracks are aligned to show the orthologous regions across the species. The LmjF22.0810 track shows a gene structure with 10 exons and 9 introns. The other tracks show the corresponding gene structures in the other species, with some variations in the number of exons and introns. The protein sequence is shown in a color-coded format where different colors represent different amino acid types. The tracks are aligned to show the orthologous regions across the species.

|                | LmjF22.0810 | LmxM22.0810 | LbrM22.0750 | LinJ22.0630 | TcCLB510525.10 | Tb927.2.7250 |
|----------------|-------------|-------------|-------------|-------------|----------------|--------------|
| LmjF22.0810    | 95.25       | 85.78       | 96.59       | 54.75       | 54.92          |              |
| LmxM22.0810    | 95.25       |             | 87.19       | 95.07       | 56.41          | 55.21        |
| LbrM22.0750    | 85.78       | 87.19       |             | 86.38       | 55.03          | 54.63        |
| LinJ22.0630    | 96.59       | 95.07       | 86.38       |             | 55.10          | 55.12        |
| TcCLB510525.10 | 54.75       | 56.41       | 55.03       | 55.10       |                | 66.49        |
| Tb927.2.7250   | 54.92       | 55.21       | 54.63       | 55.12       | 66.49          |              |

## Identity

Figure 1 displays four genomic tracks for the LmjF.22:324266:330265 region, showing gene structures and protein coding predictions. The tracks are color-coded: green for coding regions and red for non-coding regions.

- Top Track:** LmjF.22.0800. It shows a dominant splice site at (325,195) and a dominant poly (A) site at (326,984).
- Second Track:** LmjF.22.0810 - Lmjea3. It shows a poly (A) site at (326,483) and a dominant poly (A) site at (326,984).
- Third Track:** LmjF.22.0820. It shows a dominant poly (A) site at (326,984).
- Bottom Track:** LmjF.22.0820. It shows a dominant poly (A) site at (326,984).

The tracks are labeled 'Protein Coding Prediction' and 'Coding'.

**Supplemental Figure S2. *LmjF.22.0810* orthologs are highly conserved.** A) *LmjF.22.0810* orthologs from *L. infantum*, *L. braziliensis*, *L. mexicana*, *T. brucei*, and *T. cruzi* sequence alignment. Agreements are highlighted. The table below the alignment indicates the percentage of conserved nucleotides found. B) Chromosomal surroundings of *LmjF.22.0810*. Top lane shows *L. major* chromosome 22 sequence positions. Splice site and Poly A sites are portrayed, as are both genes in the chromosome at both sides of *LmjJean3* (*LmjF.22.0800* and *LmjF.22.0820*). The bottom line displays EMBOSS 6.5.7 protein coding prediction.

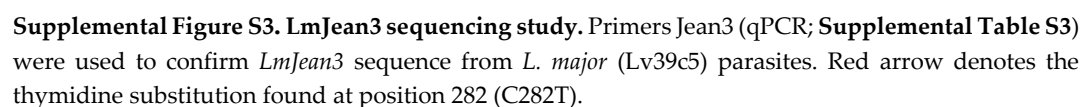

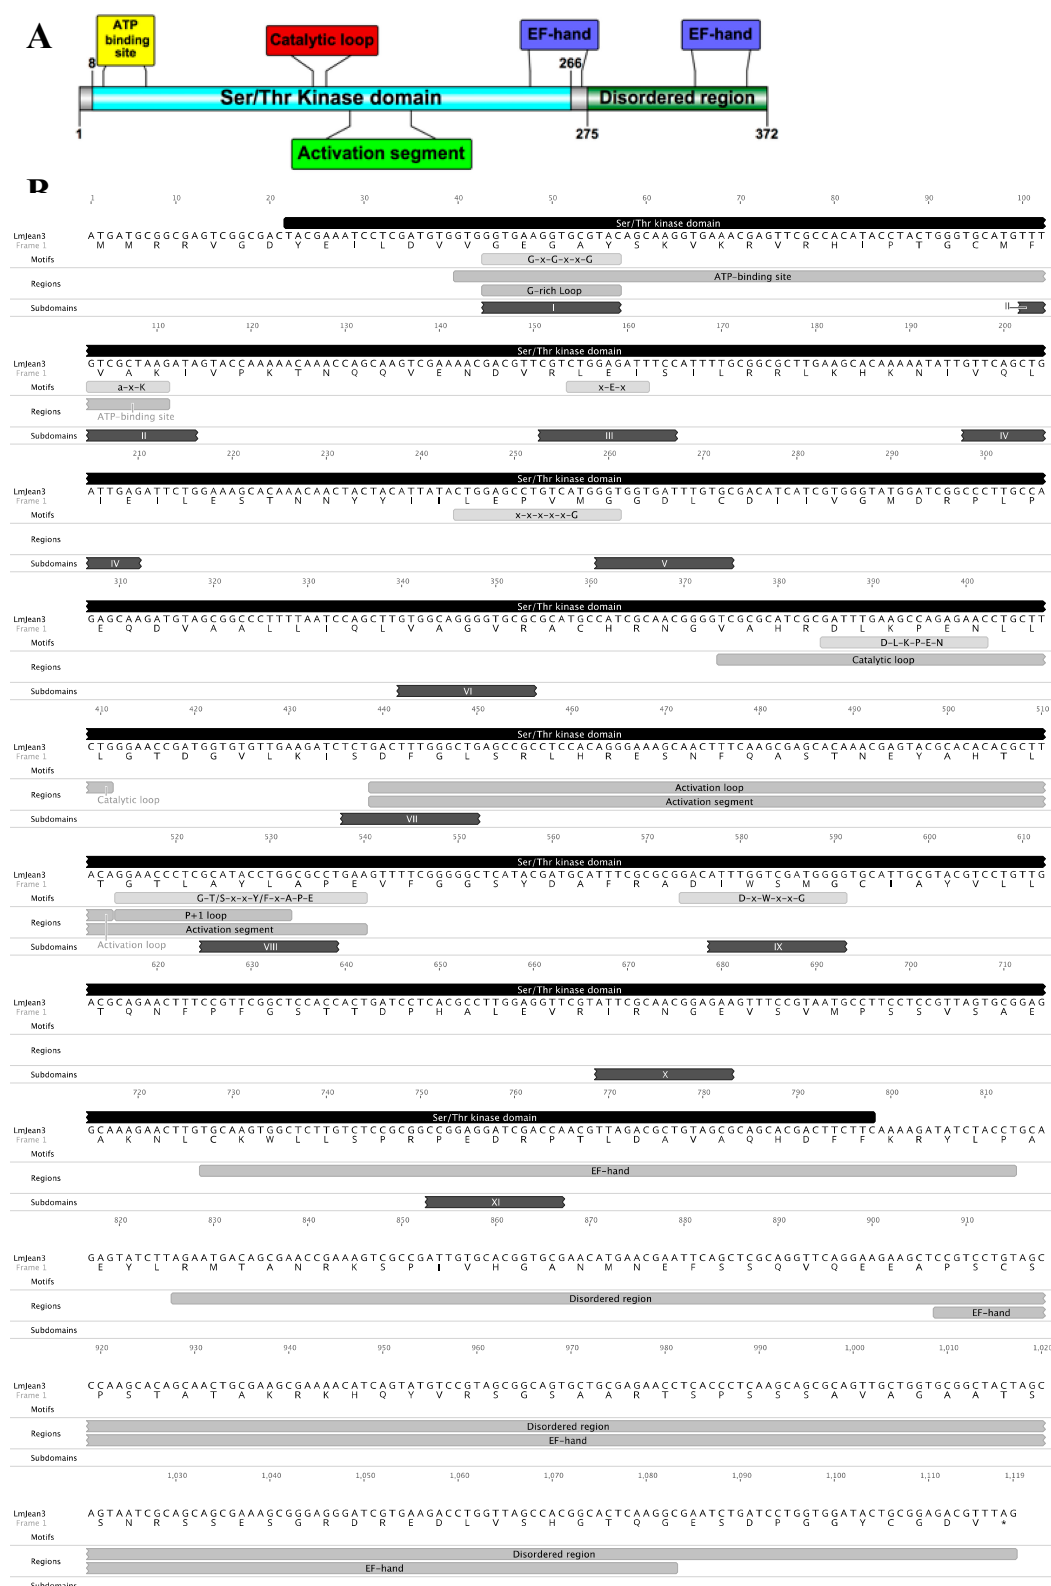

**Supplemental Figure S4.** *LmjF22.0810* encodes a putative Ser/Thr kinase and contains all the essential motifs and residues required for protein kinase activity among its 11 kinase subdomains. *LmjF22.0810* sequence and the predicted protein translation product (frame 1) are shown. Each track displays the conserved motifs, regions, or subdomains of a catalytically active kinase. The invariant (gray boxes) and nearly invariant (gray squares) residues are annotated.

A

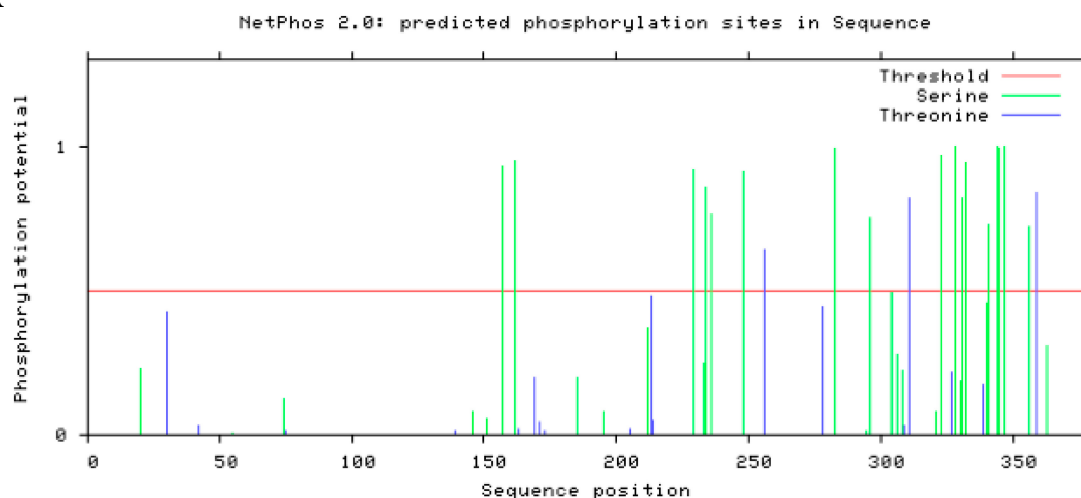

# B

```

372 Sequence
MMRRVGDYEILDVVGEGAYSKVKRVRHIPTGCMFVAKIVPKTNQOVENDVRLEISILRLKHKHNIVOLIEILESTNNYYI      80
ILEPVMGGDLCDIIVGMDRPLPEQDVAALLIQLVAGVRACHRNGVAHRDLKPENLLGLTDGVLKISDFGLSLRHRESNFQ      160
ASTNEYAHTLTGTLAYLAPEVFGGSYDAFRADIWSMGCIAAYVLLTNQFPFGSTDPHALEVRIRNGEVSVMPSVSAEAK      240
NLCKWLLSPREDRPTLDAVAQHDFFKRYLPAEYLRMTANRKSPIVHGANNNEFSSSQVQEEAPSCSPSTATAKRKHQYVR      320
SGSAARTSPSSSAVAGAATSSNRSSSEGRDREDLVSHGTQGESDFGGYCGDV      400
.....S.....      80
.S.....S.....S.S.....      160
.....S.....T.....S.....S.....      240
..S...S..SS.....S..SS.S.....S..T.....      320
.....      400

Phosphorylation sites predicted:      Ser: 17 Thr: 3

```

**Supplemental Figure S5. LmJean3 phosphorylation sites prediction.** **A)** The plot illustrates residue positions on the X-axis, while on the Y-axis the phosphorylation potential of each residue is drawn as green (serine) and blue (threonine) lines. Only serine and threonine residues that exceed the threshold (0.50) were considered phosphorylation sites. **B)** The 372 amino acids from the LmJean3 sequence are shown. Serine and threonine residues with a score greater than the threshold are plotted on the dotted line.

```
# WEBSEQUENCE Length: 426
# WEBSEQUENCE Number of predicted TMHs: 2
# WEBSEQUENCE Exp number of AAs in TMHs: 39.19509
# WEBSEQUENCE Exp number, first 60 AAs: 39.17402
# WEBSEQUENCE Total prob of N-in: 0.00087
# WEBSEQUENCE POSSIBLE N-term signal sequence
WEBSEQUENCE TMHMM2.0 outside 1 9
WEBSEQUENCE TMHMM2.0 TMhelix 10 27
WEBSEQUENCE TMHMM2.0 inside 28 33
WEBSEQUENCE TMHMM2.0 TMhelix 34 53
WEBSEQUENCE TMHMM2.0 outside 54 426
```

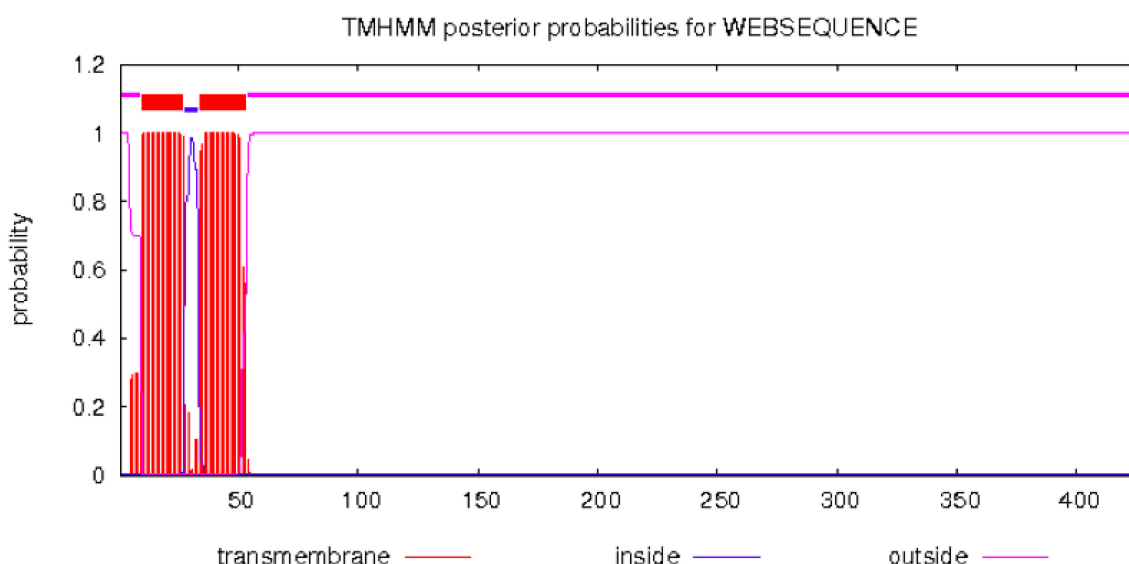

**Supplemental Figure S6. *L. braziliensis* Jean3 transmembrane helices prediction.** The prediction for the 426 amino acids from LbJean3 sequence is shown. The plot illustrates the predicted location of the intervening loop regions: The X-axis displays the residue positions, while the Y-axis shows the probability for each residue to be part of a membrane helix. The number of predicted transmembrane helices (TMH) was 2. The figure and the predictions were plotted by the TMHMM Server (<http://www.cbs.dtu.dk/services/TMHMM/>).

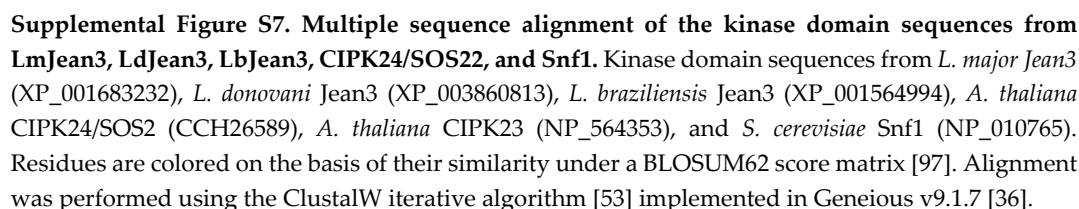

**Supplemental Figure S7. Multiple sequence alignment of the kinase domain sequences from LmJean3, LdJean3, LbJean3, CIPK24/SOS2, and Snf1.** Kinase domain sequences from *L. major* Jean3 (XP\_001683232), *L. donovani* Jean3 (XP\_003860813), *L. braziliensis* Jean3 (XP\_001564994), *A. thaliana* CIPK24/SOS2 (CCH26589), *A. thaliana* CIPK23 (NP\_564353), and *S. cerevisiae* Snf1 (NP\_010765). Residues are colored on the basis of their similarity under a BLOSUM62 score matrix [97]. Alignment was performed using the ClustalW iterative algorithm [53] implemented in Geneious v9.1.7 [36].

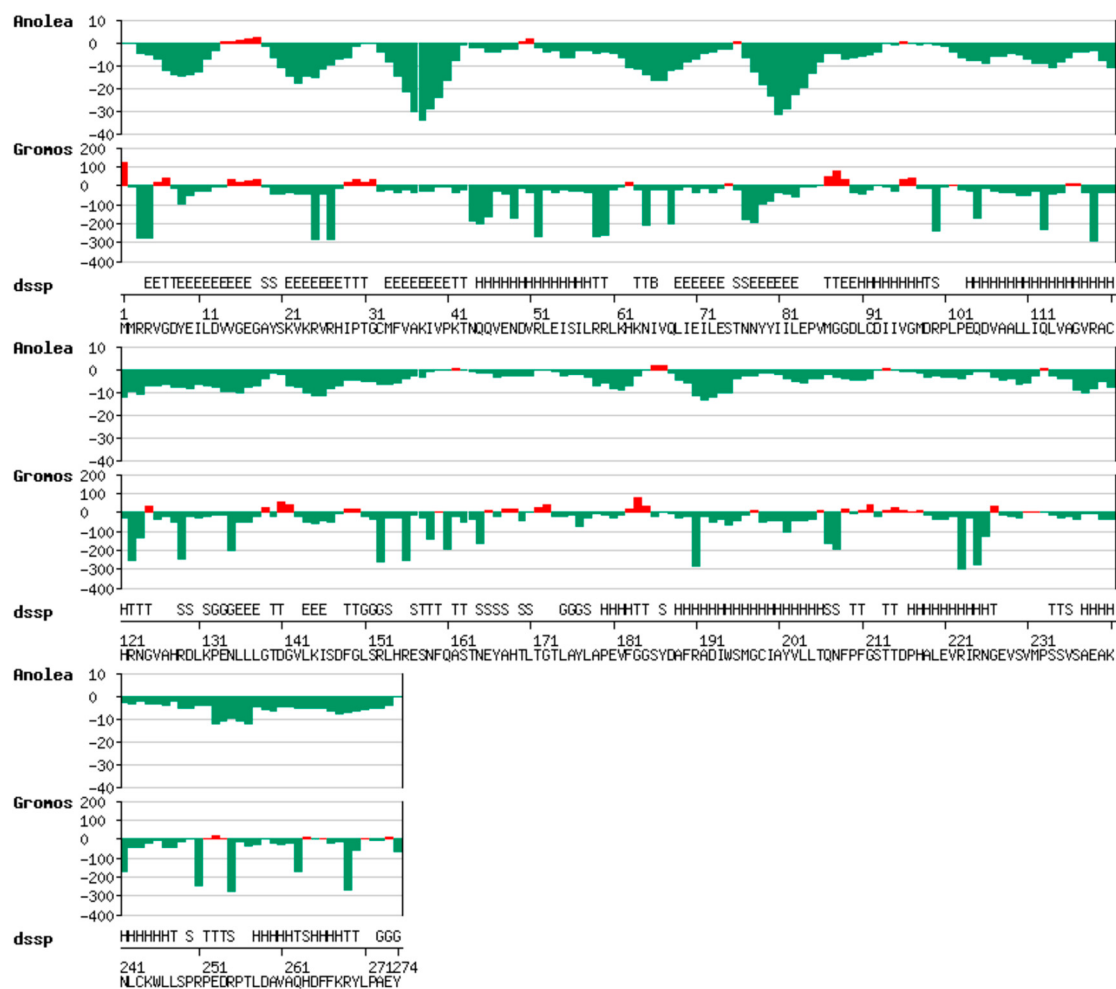

**Supplemental Figure S8. ANOLEA and GROMOS quality estimation and DSSP defined secondary structure of LmJean3 model.** The atomic empirical mean force potential (ANOLEA) was used to assess the packing quality of the models. The y-axis of the plot represents the energy of each amino acid of the protein chain. Negative energy values (in green) represent favorable energy environment, whereas positive values (in red) indicate unfavorable energy environment for a specific amino acid. GROMOS is a general-purpose molecular dynamics computer simulation package for the study of biomolecular systems and can be applied to the analysis of conformations obtained by experiment or by computer simulation. The y-axis of the plot represents the energy for each amino acid of the protein chain. Negative energy values (in green) depict a favorable energy environment, whereas positive values (in red) illustrate an unfavorable energy environment for a given amino acid. The DSSP program defines secondary structure, geometrical features, and solvent exposure of proteins, given atomic coordinates in Protein Data Bank (PDB) format. At the bottom, the protein sequence of LmJean3 is shown.

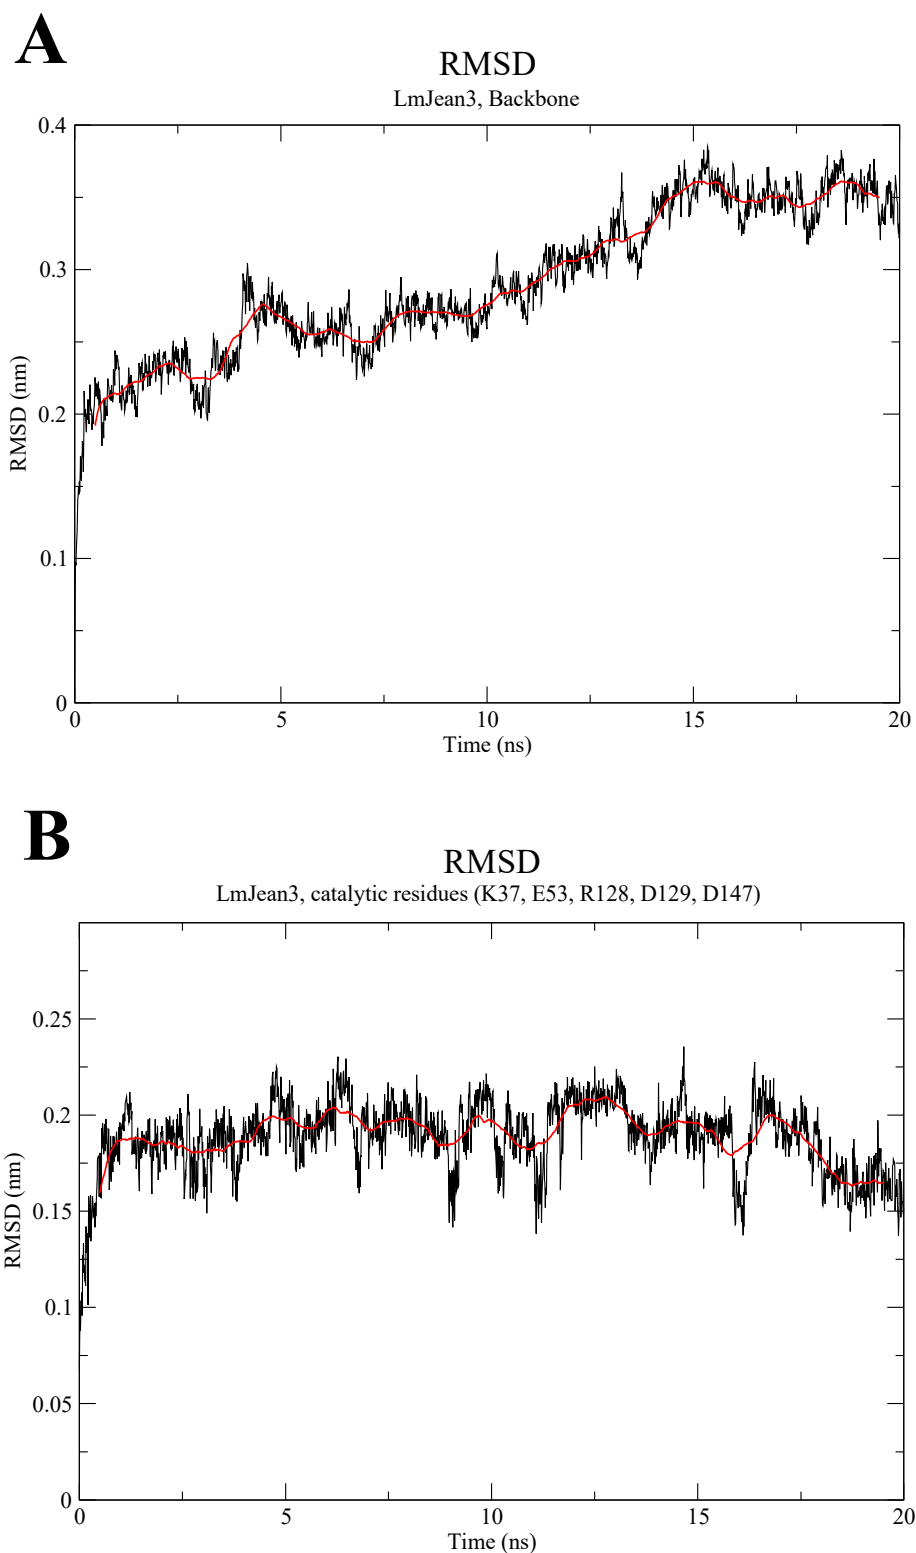

**Supplemental Figure S9. Monitoring of MD trajectories.** **A)** Time evolution of the RMSD of all protein C $\alpha$  backbone atoms. **B)** Time evolution of the RMSD of the catalytically relevant residues from LmJean3 (K37, E53, R128, D129, and D147). The red line indicates the running averages with a length of 100 ps.

**Supplemental Table S4.** LmJean3 global quality estimation.

|                                 | <b>LmJean3</b> |
|---------------------------------|----------------|
| <b>Modelled residues</b>        | 275            |
| <b>RMSD (Å)</b>                 | 1.87           |
| <b>ERRAT (%)</b>                |                |
| Overall quality factor          | 98.11          |
| <b>QMEAN6 (Z-score)</b>         |                |
| Overall Z-score                 | -0.42          |
| C $\beta$ interaction           | -0.73          |
| All-atom interaction            | -0.33          |
| Solvation                       | -0.43          |
| Torsion                         | -0.09          |
| Secondary structure agreement   | 0.47           |
| Solvent accessibility agreement | -0.51          |
| <b>SolvX</b>                    |                |
| Overall score                   | -95.20         |
| <b>Verify 3D (%)</b>            |                |
| 3D–1D score $\geq 0.2$          | 92.36          |
| <b>ANOLEA (%)</b>               |                |
| High energy amino-acids         | 5.45           |
| <b>Ramachandran plot (%)</b>    |                |
| Most favored regions            | 88.40          |
| Additional allowed regions      | 10.80          |
| Generously allowed regions      | 0.80           |
| Disallowed regions              | 0              |

**Supplemental Table S5.** Predicted salt bridges in LmJean3 kinase domain. For each identified salt bridge, the average center of mass (COM) distance between each residue, the number of frames, and their persistence during the trajectory were calculated.

| Donor  | Acceptor | COM distance (<4.0 Å) | Frames | Occupancy (%) |
|--------|----------|-----------------------|--------|---------------|
| LYS131 | ASP129   | 2.80 ± 0.23           | 1970   | 98.45         |
| LYS37  | ASP147   | 3.03 ± 0.52           | 1650   | 82.46         |
| LYS144 | GLU83    | 3.11 ± 0.32           | 1941   | 97.01         |
| ARG254 | GLU180   | 3.30 ± 0.07           | 2002   | 100.00        |
| LYS21  | GLU16    | 3.41 ± 0.78           | 1756   | 87.71         |
| ARG152 | GLU53    | 3.53 ± 0.44           | 1715   | 85.66         |
| ARG250 | ASP253   | 3.62 ± 0.88           | 1886   | 94.21         |
| LYS41  | GLU73    | 3.65 ± 0.37           | 1931   | 96.45         |
| ARG224 | GLU220   | 3.70 ± 0.46           | 1999   | 99.85         |
| ARG4   | GLU9     | 3.93 ± 0.85           | 1711   | 85.46         |

**Supplemental Table S6.** LmJean3 SiteMap property values and Dscore<sup>a</sup>.

| Site | Dscore | SiteScore | Size<br>(site<br>points) | Volume<br>(Å <sup>3</sup> ) | exposure | enclosure | contact | phobic <sup>b</sup> | philic <sup>b</sup> | balance <sup>b</sup> | don/acc <sup>c</sup> |
|------|--------|-----------|--------------------------|-----------------------------|----------|-----------|---------|---------------------|---------------------|----------------------|----------------------|
| A    | 1.025  | 1.045     | 184                      | 502.84                      | 0.575    | 0.765     | 0.982   | 0.464               | 1.145               | 0.405                | 0.779                |
| B    | 0.848  | 0.916     | 77                       | 228.09                      | 0.609    | 0.707     | 0.969   | 0.258               | 1.230               | 0.210                | 0.739                |
| C    | 0.791  | 0.795     | 57                       | 100.50                      | 0.676    | 0.613     | 0.815   | 0.772               | 0.878               | 0.879                | 0.602                |
| D    | 0.629  | 0.750     | 48                       | 76.49                       | 0.484    | 0.660     | 0.899   | 0.295               | 1.282               | 0.230                | 0.423                |
| E    | 0.587  | 0.620     | 30                       | 99.13                       | 0.746    | 0.560     | 0.696   | 0.500               | 0.811               | 0.617                | 0.609                |

<sup>a</sup>Druggability score.

<sup>b</sup>These properties, labeled “phob” and “phil”, measure the relative hydrophobic and hydrophilic character of the site. The “balance” property expresses the ratio of the two.

<sup>c</sup>Indicates the degree to which a well-structured ligand might be expected to donate, rather than accept, hydrogen bonds.

Supplemental Table S7. LmJean3 site B docking results\*.

| Rank | ZINC ID  | Chemical Name            | Chemical Structure                                                                 | DockScore | Penalties | HBPenal <sup>a</sup> | ExposPenal <sup>b</sup> | RotPenal <sup>c</sup> | EpikStatePenalty <sup>d</sup> |
|------|----------|--------------------------|------------------------------------------------------------------------------------|-----------|-----------|----------------------|-------------------------|-----------------------|-------------------------------|
| 1    | 60183170 | Paromomycin              | 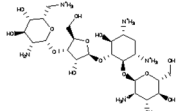  | -11.46    | 0.00      | 0.00                 | 0.17                    | 0.13                  | 0.00                          |
| 2    | 71928289 | Neomycin stereoisomer A  | 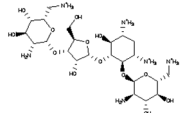  | -10.93    | 0.00      | 0.00                 | 0.10                    | 0.11                  | 0.00                          |
| 3    | 04096846 | Rutin                    | 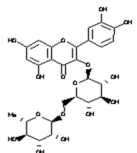  | -10.84    | 0.00      | 0.00                 | 0.04                    | 0.09                  | 0.00                          |
| 4    | 60183167 | Paromomycin stereoisomer | 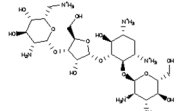  | -10.66    | 0.00      | 0.00                 | 0.19                    | 0.13                  | 0.00                          |
| 5    | 71928290 | Neomycin stereoisomer B  | 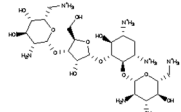 | -10.24    | 0.00      | 0.00                 | 0.79                    | 0.08                  | 0.00                          |

\*Chemical compounds are ranked according to their docking score. Penalties for each ligand are included in the table.

<sup>a</sup>Penalty for ligands with large hydrophobic contacts and low H-bond scores.

<sup>b</sup>Penalty for solvent-exposed ligand groups; cancels van der Waals terms.

<sup>c</sup>Rotatable bond penalty.

<sup>d</sup>Epik state penalties for ionization or tautomeric states that dock in preference to the most common state at physiological pH.

Supplemental Table S7. LmJean3 site B docking results\*.

| Rank | ZINC ID  | Chemical Name           | Chemical Structure                                                                 | DockScore | Penalties | HBPenal <sup>a</sup> | ExposPenal <sup>b</sup> | RotPenal <sup>c</sup> | EpikStatePenalty <sup>d</sup> |
|------|----------|-------------------------|------------------------------------------------------------------------------------|-----------|-----------|----------------------|-------------------------|-----------------------|-------------------------------|
| 6    | 03977803 | Diosmin stereoisomer    | 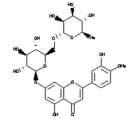  | -9.66     | 0.00      | 0.00                 | 0.08                    | 0.09                  | 0.00                          |
| 7    | 71928292 | Neomycin stereoisomer C | 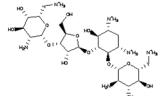  | -9.58     | 0.00      | 0.00                 | 0.39                    | 0.11                  | 0.00                          |
| 8    | 03794794 | Mitoxantrone            | 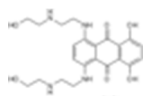  | -9.14     | 0.00      | 0.00                 | 0.20                    | 0.52                  | 0.00                          |
| 9    | 08214692 | Tobramycin              | 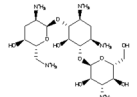  | -9.06     | 0.00      | 0.00                 | 0.02                    | 0.19                  | 0.00                          |
| 10   | 04098512 | Diosmin                 | 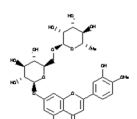  | -9.05     | 0.00      | 0.00                 | 0.00                    | 0.09                  | 0.00                          |
| 11   | 33359835 | Amikacin stereoisomer   | 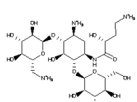 | -9.04     | 3.00      | 0.00                 | 0.05                    | 0.19                  | 0.00                          |

\*Chemical compounds are ranked according to their docking score. Penalties for each ligand are included in the table.

<sup>a</sup>Penalty for ligands with large hydrophobic contacts and low H-bond scores.

<sup>b</sup>Penalty for solvent-exposed ligand groups; cancels van der Waals terms.

<sup>c</sup>Rotatable bond penalty.

<sup>d</sup>Epik state penalties for ionization or tautomeric states that dock in preference to the most common state at physiological pH.

2

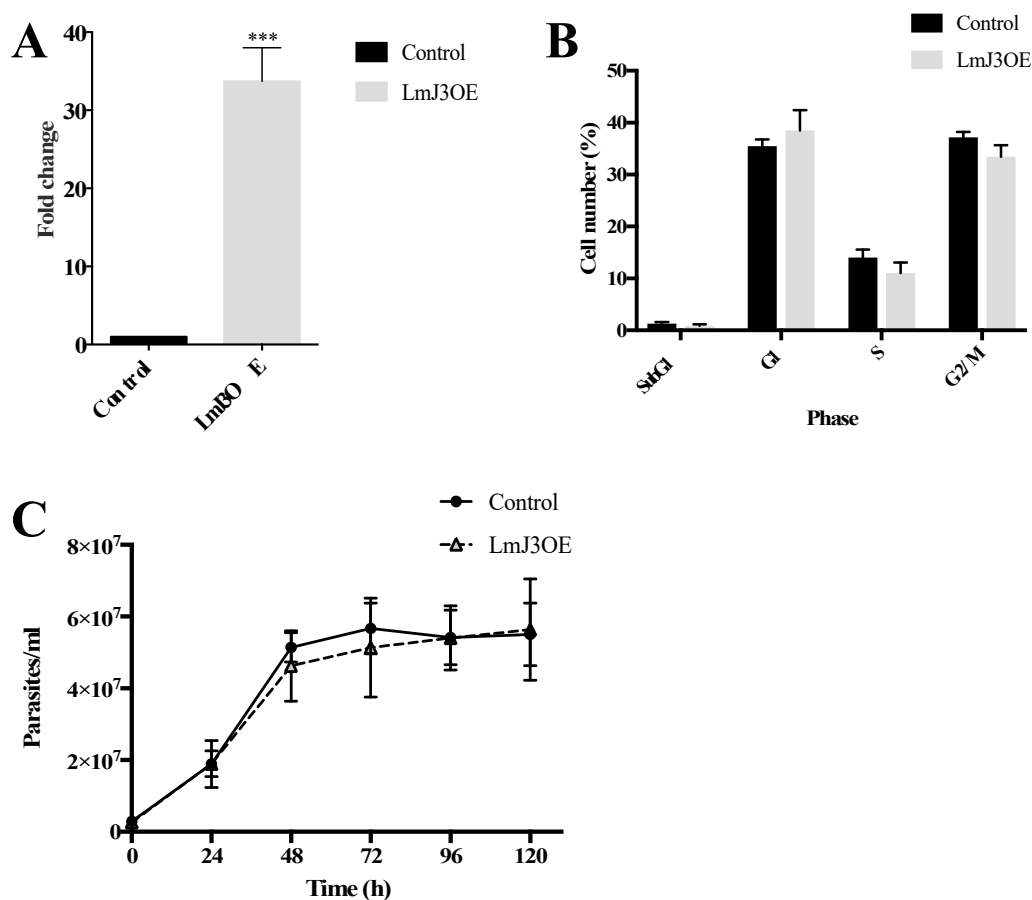

3

**Supplemental Figure S10. Generation of *LmJean3*-overexpressing parasites.** **A)** The rate of overexpression of *Jean3* was measured by qPCR in the control (pXG-*Hyg*) and *LmJean3*-overexpressing (LmJ3OE; pXG-*LmJean3*) strains. **B)** The cell cycle distribution of control and LmJ3OE parasites was evaluated by FACS analysis. The percentage of cells found in each phase of the cell cycle was similar between the control and LmJ3OE samples. **C)** The growth of control and LmJ3OE parasites was evaluated for 120 h. The growth curves of the two strains displayed analogous shape and distribution. Data are represented as the means ( $\pm$  SD) from three independent experiments (\*\*  $P < 0.01$ ).

10

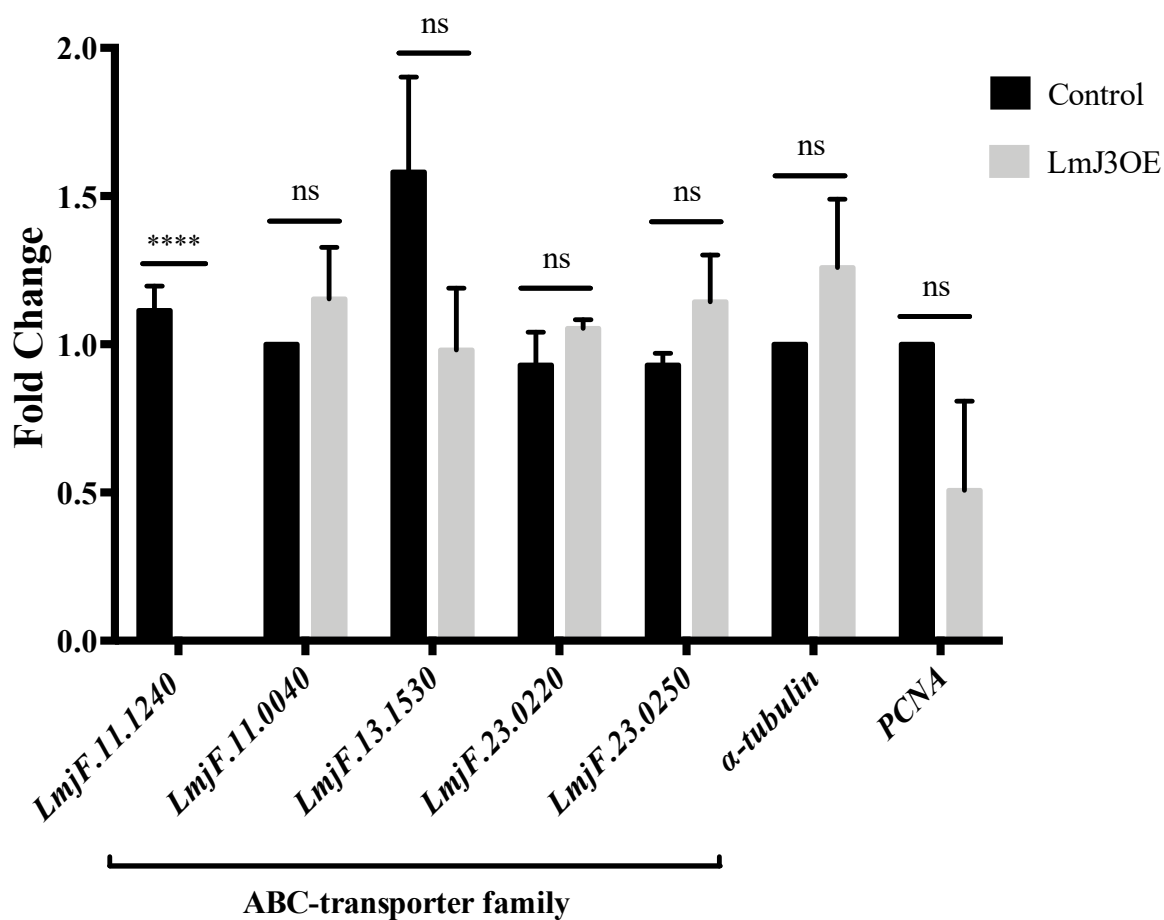

**Supplemental Figure S11. Gene expression analysis in LmJ3OE and control parasites.** The expression of genes of the ABC-transporter family (*LmjF.11.1240*, *LmjF.11.0040*, *LmjF.13.1530*, *LmjF.23.0220*, *LmjF.23.0250*),  $\alpha$ -tubulin, and PCNA were quantified by qPCR. Bars represent the means ( $\pm$  SEM) from three independent experiments (ns, non-significant, \*\*\*  $P < 0.001$ ).

**Supplemental Table S8.** Drug activity profile of *L. major* cell lines. Promastigotes were grown as described in *Materials and Methods* for 48 and 72 h at 26 °C in the presence of increasing drug concentrations. Half-maximal effective concentrations (EC<sub>50</sub>) were measured using an MTT-based assay. Results are expressed as means [± standard deviation (SD)] from three independent experiments.

| Compound              | EC <sub>50</sub> (μM) mean ± SD |               |                     |                      |
|-----------------------|---------------------------------|---------------|---------------------|----------------------|
|                       | pXG-Hyg                         |               | pXG-LmJean3         |                      |
|                       | 48h                             | 72h           | 48h                 | 72h                  |
| <b>Paromomycin</b>    | 67.57 ± 8.49                    | 120.00 ± 9.45 | 224.00 ± 44.85 (**) | 210.60 ± 11.60 (***) |
| <b>Geneticin</b>      | 2.37 ± 0.41                     | 2.55 ± 0.53   | 4.87 ± 0.29 (***)   | 5.24 ± 0.63 (**)     |
| <b>Amphotericin B</b> | 0.09 ± 0.02                     | 0.16 ± 0.02   | 0.05 ± 0.01 (*)     | 0.10 ± 0.004 (*)     |
| <b>Miltefosine</b>    | 8.57 ± 1.11                     | 8.82 ± 0.70   | 5.97 ± 0.38 (*)     | 5.83 ± 1.39 (*)      |

*p* values <0.05 were considered statistically significant (\**p* < 0.05, \*\* *p* < 0.01, \*\*\* *p* < 0.001).

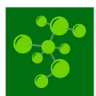

Supplement: Supplementary file 1 [file biomolecules-09-00723-s001.pdf]
